# Supplementary material for: A Bibliometric and Citation Network Analysis of Myopia Genetics
Source: PubMed Central journal article supplement (PMC8003911; doi:10.3390/genes12030447), 2021-03-21
Supplement: genes-12-00447-s001.pdf [file genes-12-00447-s001.pdf]

Supplementary Material.

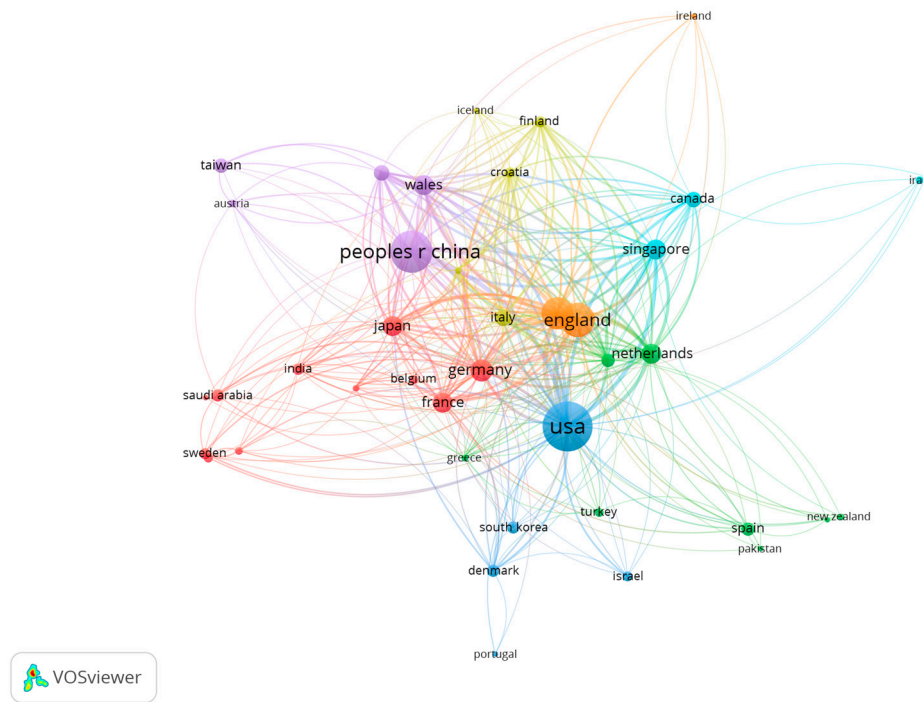

Supplementary figure S1. Collaboration between countries.

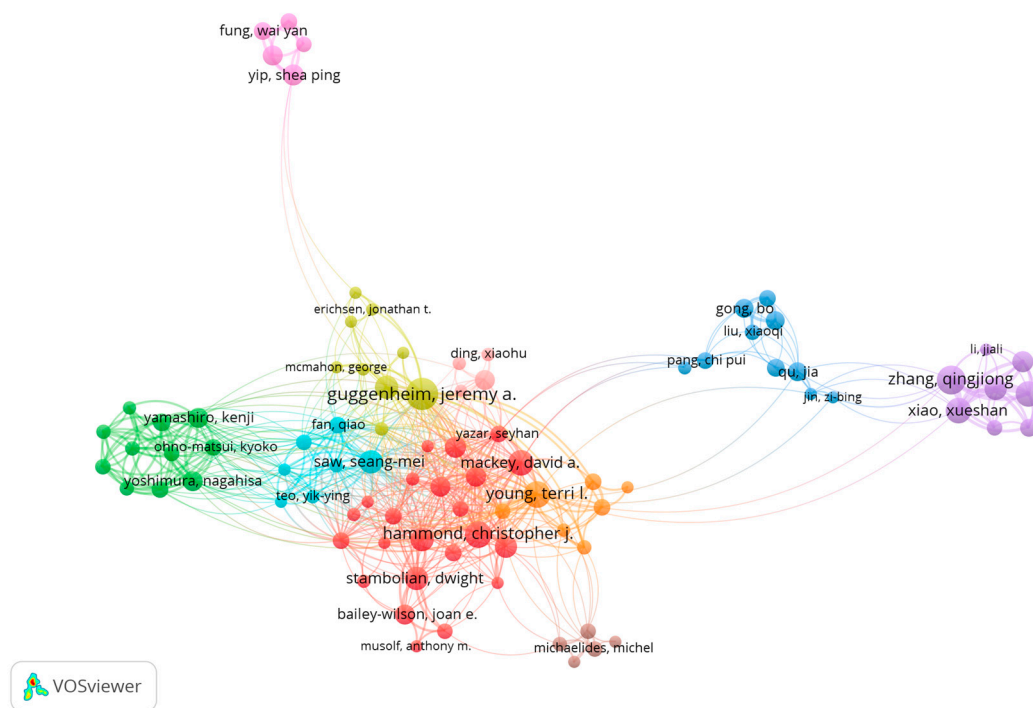

Supplementary figure S2. Collaboration between authors.

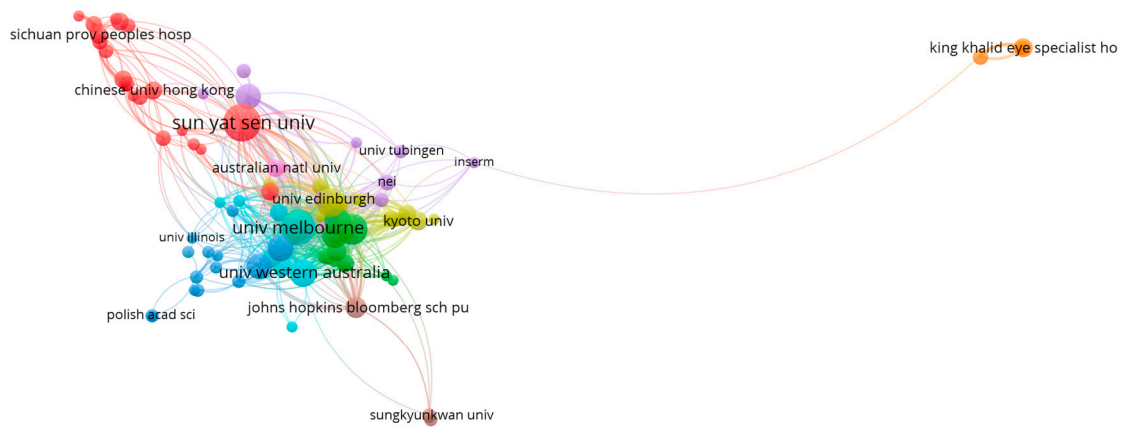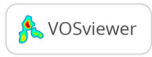

**Supplementary figure S3.** Collaboration between institutions.

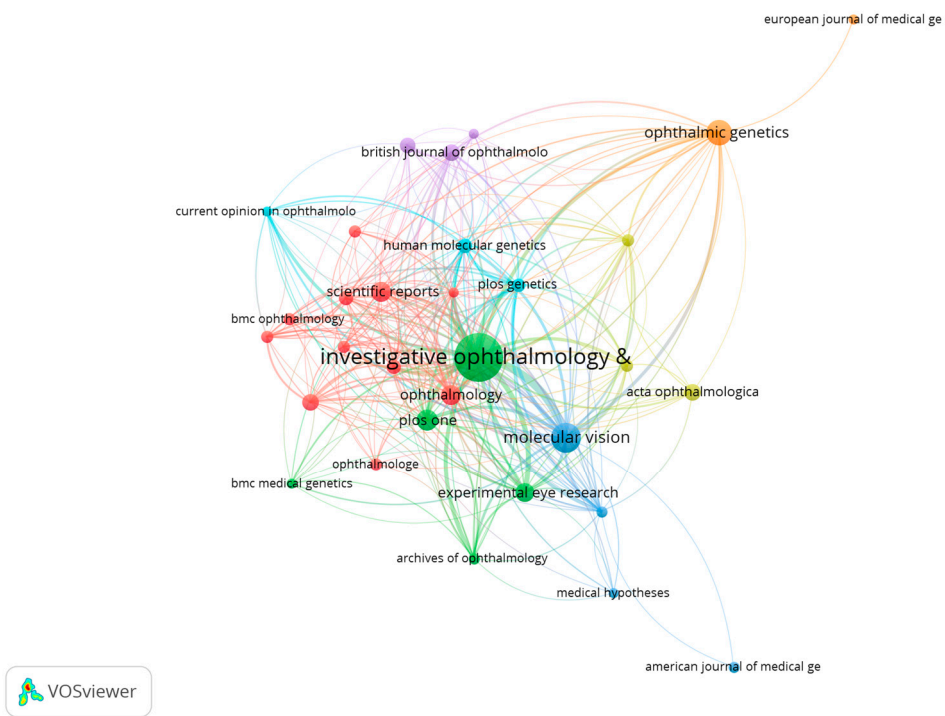

**Supplementary figure S4.** Collaboration between journals.

**Supplementary table S1.** Characteristics of the main countries.

| <b>Group</b> | <b>Color</b>  | <b>Main Countries</b> | <b>Publications</b> | <b>Links</b> |
|--------------|---------------|-----------------------|---------------------|--------------|
| 1st          | Red           | India                 | 16                  | 35           |
| 2nd          | Green         | Norway<br>Switzerland | 53<br>20            | 245<br>122   |
| 3rd          | Dark<br>blue  | The United States     | 225                 | 396          |
| 4th          | Violet        | China                 | 208                 | 22           |
| 5th          | Light<br>blue | Singapore             | 53                  | 237          |
| 6th          | Orange        | England               | 113                 | 336          |

**Supplementary table S2.** Characteristics of the main authors.

| <b>Group</b> | <b>Color</b>  | <b>Main authors</b>          | <b>Publications</b> | <b>Links</b> |
|--------------|---------------|------------------------------|---------------------|--------------|
| 1st          | Red           | Hammond C<br>Wojciechowski R | 43<br>30            | 89<br>121    |
| 2nd          | Green         | Mackey DA                    | 38                  | 110          |
| 3rd          | Dark blue     | Shi Y                        | 12                  | 32           |
| <b>4th</b>   | <b>Yellow</b> | <b>Guggenheim JA</b>         | <b>48</b>           | <b>121</b>   |
| 5th          | Violet        | Qinqiong Z                   | 28                  | 102          |
| 6th          | Light blue    | Saw SM                       | 39                  | 82           |
| 7th          | Orange        | Young TL                     | 38                  | 111          |

**Supplementary table S3.** Characteristics of the main institutions.

| <b>Group</b> | <b>Color</b>  | <b>Main institutions</b>                | <b>Publications</b> | <b>Links</b> |
|--------------|---------------|-----------------------------------------|---------------------|--------------|
| 1st          | Red           | Sun Yat-sen University                  | 59                  | 69           |
| 2nd          | Green         | Kings College London                    | 51                  | 140          |
|              |               | Cardiff University                      | 45                  | 116          |
| 3rd          | Dark          | National Human Genome                   | 34                  | 68           |
|              | blue          | Research Institute                      |                     |              |
| 4th          | Yellow        | National University of<br>Singapore     | 43                  | 161          |
| 5th          | Violet        | The Hong Kong Polytechnic<br>University | 25                  | 50           |
| 6th          | Light<br>blue | Melbourne University                    | 56                  | 150          |

**Supplementary table S4.** Characteristics of the main journals.

| <b>Group</b> | <b>Color</b>  | <b>Main Journals</b>                          | <b>Publications</b> | <b>Links</b> |
|--------------|---------------|-----------------------------------------------|---------------------|--------------|
| 1st          | Red           | Scientific reports                            | 19                  | 90           |
|              |               | <b>Investigative</b>                          |                     |              |
| <b>2nd</b>   | <b>Green</b>  | <b>Ophthalmology &amp; Visual<br/>Science</b> | <b>113</b>          | <b>606</b>   |
| 3rd          | Dark<br>blue  | Molecular vision                              | 45                  | 353          |
| 4th          | Yellow        | Acta Ophthalmologica                          | 14                  | 27           |
| 5th          | Violet        | British Journal of<br>Ophthalmology           | 214                 | 69           |
| 6th          | Light<br>blue | Plos one                                      | 21                  | 193          |
